# Supplementary material for: Lanthanide functionalized MOF thin films as effective luminescent materials and chemical sensors for ammonia
Source: Royal Society of Chemistry journal article supplement (doi:10.1039/d0dt03069d), 2020-01-01
Supplement: d0dt03069d1.pdf [file d0dt03069d1.pdf]

## Supporting information

### Lanthanide functionalized MOFs thin films as effective luminescent materials and chemical sensor for ammonia

Wan-Peng Ma,<sup>a</sup> Bing Yan<sup>b\*</sup>

*a. School of Chemical Science and Engineering, Tongji University, Siping Road 1239, Shanghai 200092, China.*

*b. School of Materials Science and Engineering, Liaocheng University, Liaocheng 252059, China.*

---

\* Corresponding author: Email address: [byan@tongji.edu.cn](mailto:byan@tongji.edu.cn) (Bing Yan)

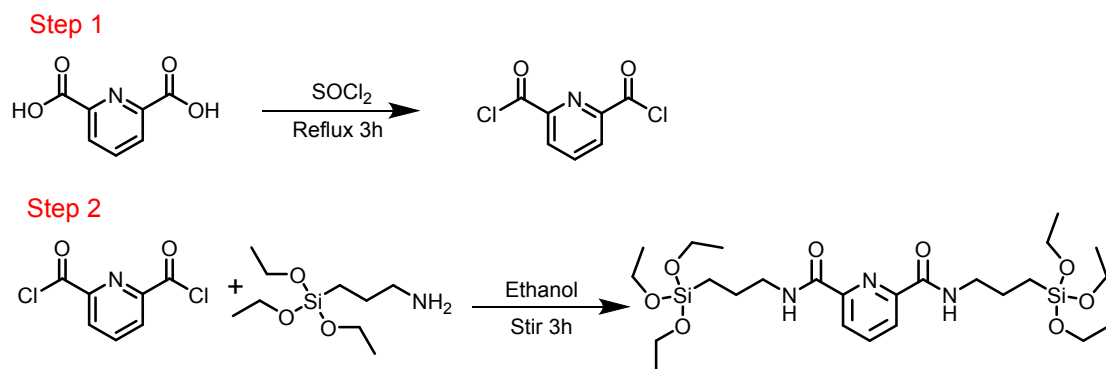

**Fig. S1.** The synthesis process of Linker (**L**)

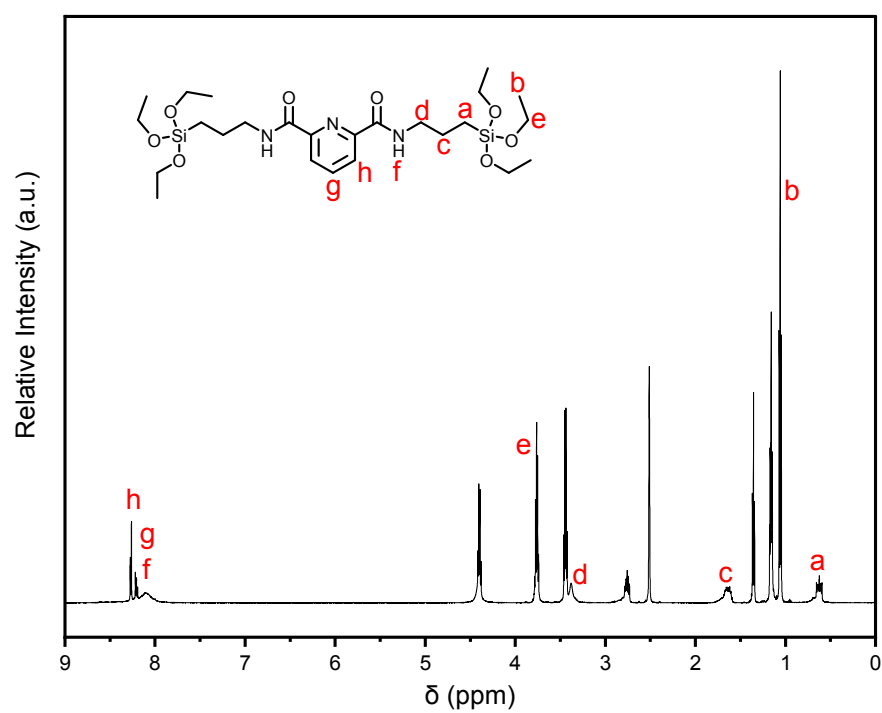

**Fig. S2.** The  $^1\text{H}$  NMR ( $\text{DMSO-D}_6$ , 600 MHz) spectra of **L**

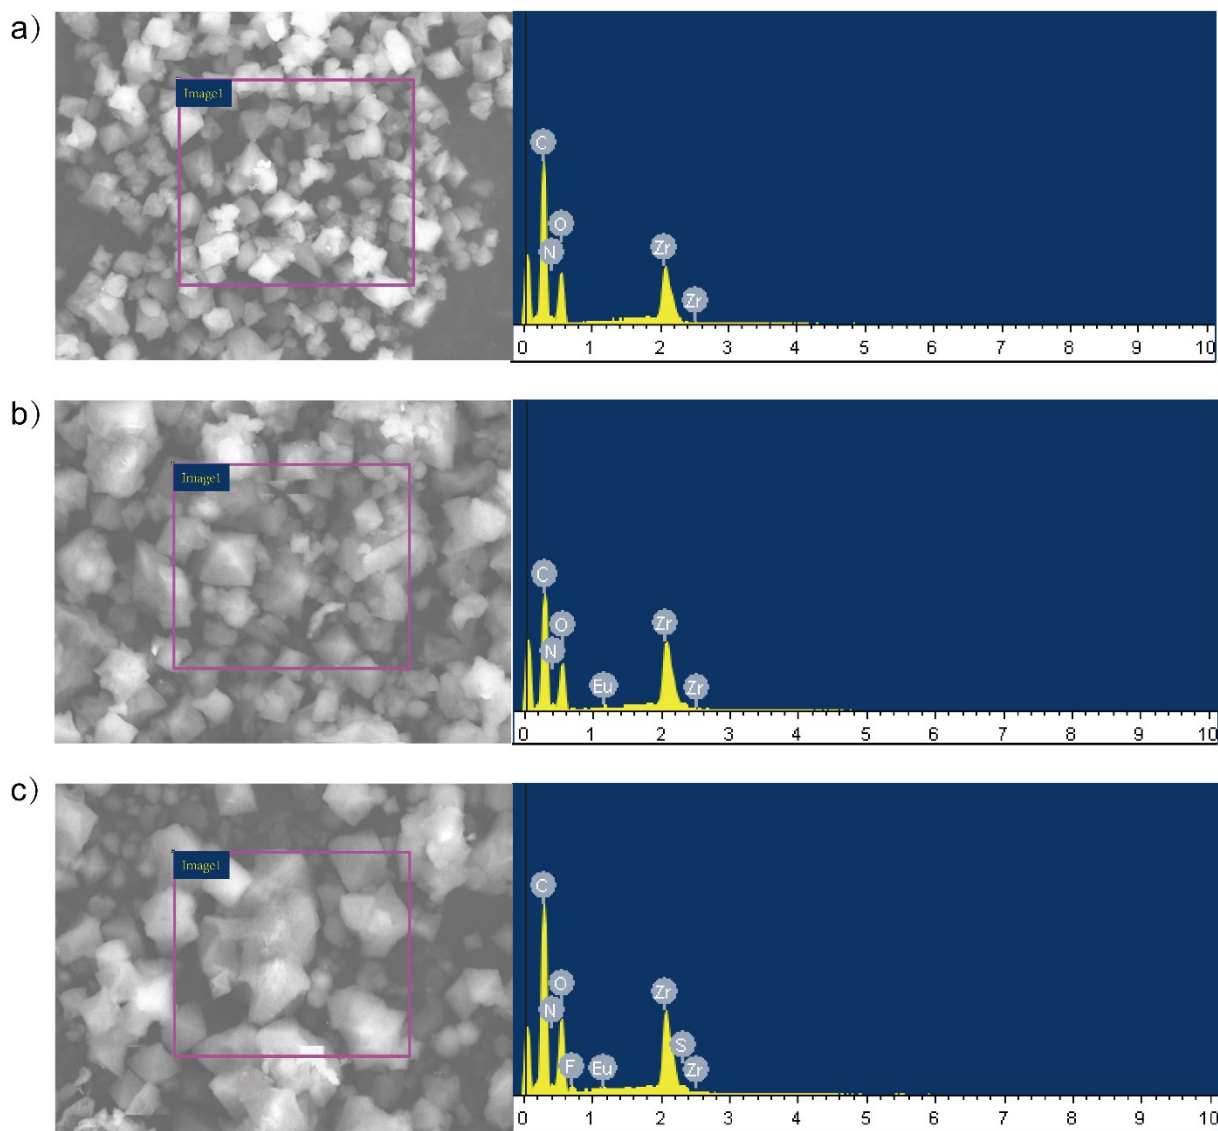

**Fig. S3.** The EDS spectra of **UMOF** (a), **Eu@UMOF** (b), **Eu(TTA)@UMOF** (c)

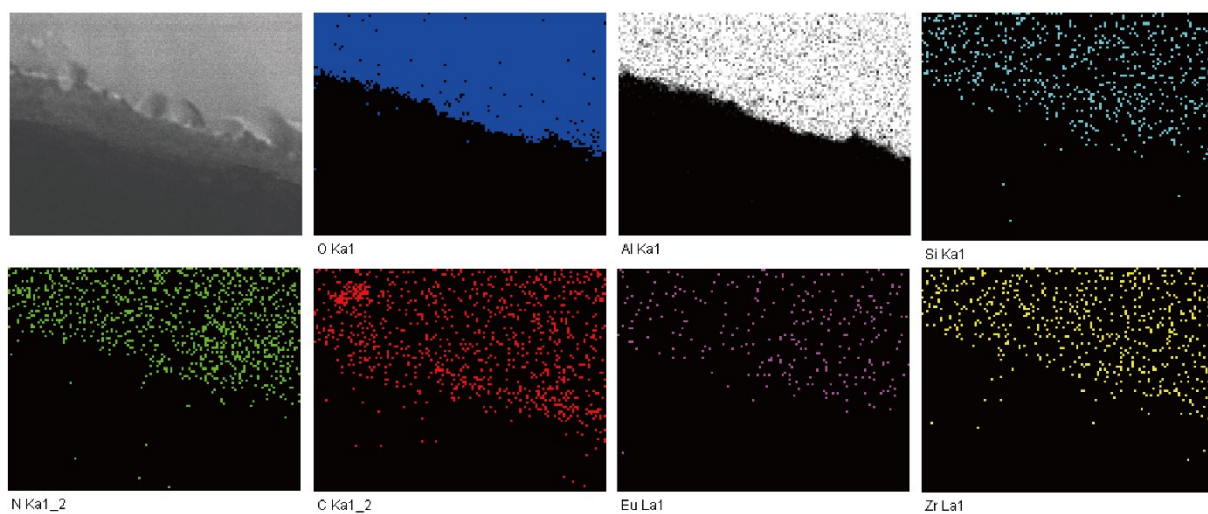

**Fig. S4.** The EDS mapping of **Eu@UMOF-Eu-LA** film's cross-section

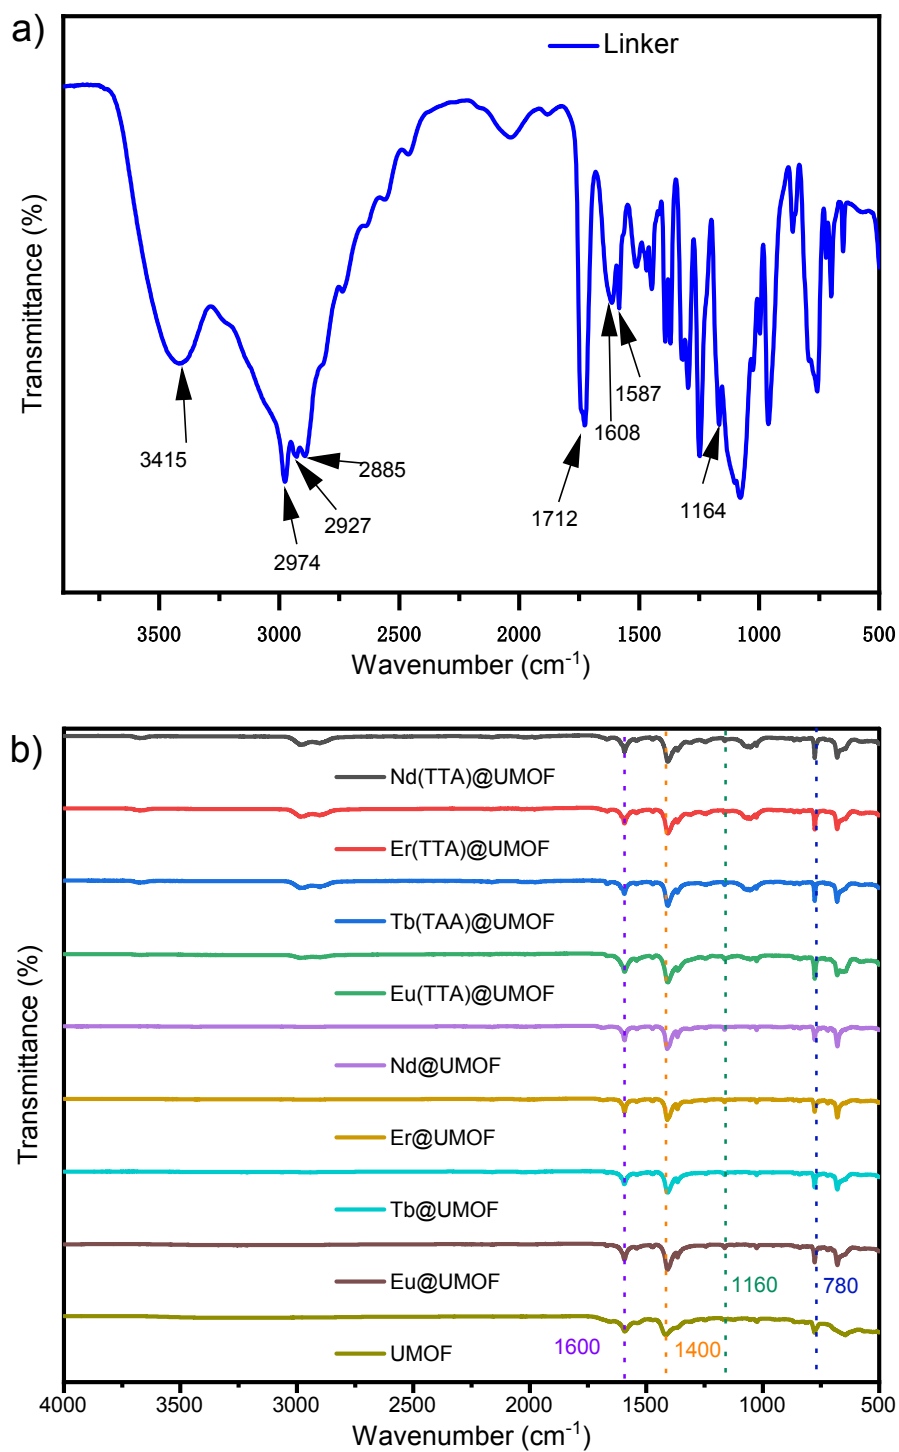

**Fig. S5.** (a) The FTIR spectra of L. (b) The FTIR spectra of UMOF, Ln@UMOF and Ln(TTA/TAA)@UMOF.

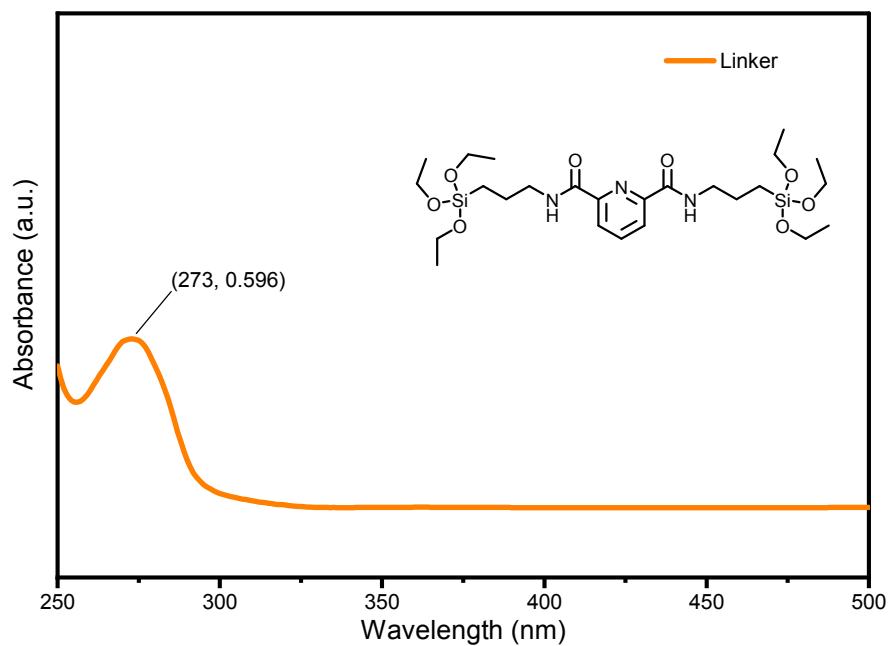

Fig. S6. The UV-Vis absorption spectra of L.

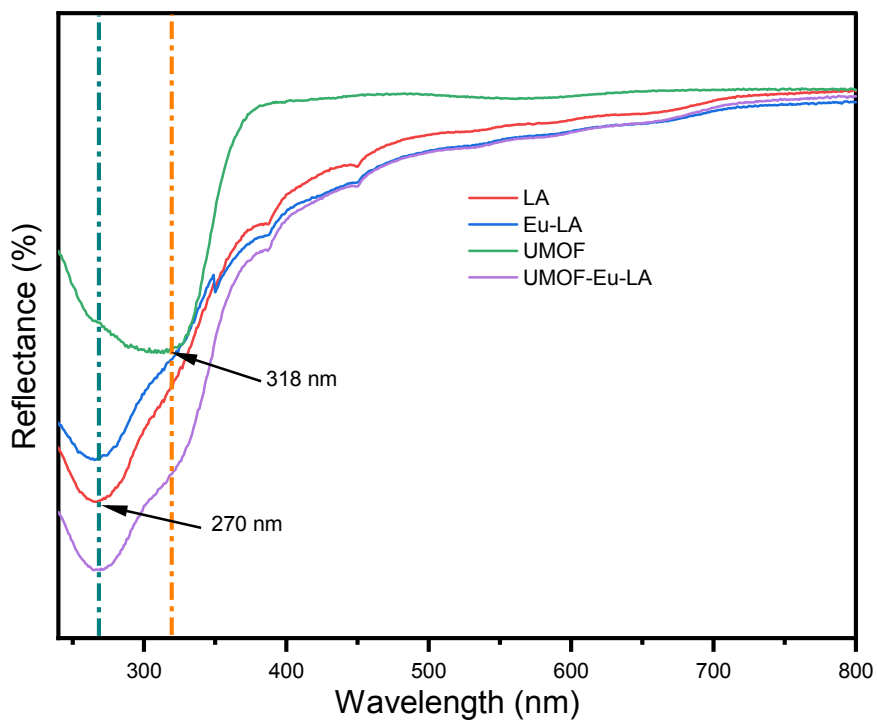

Fig. S7. The UV-Vis diffuse reflection spectra of LA, Eu-LA, UMOF, UMOF-LA.

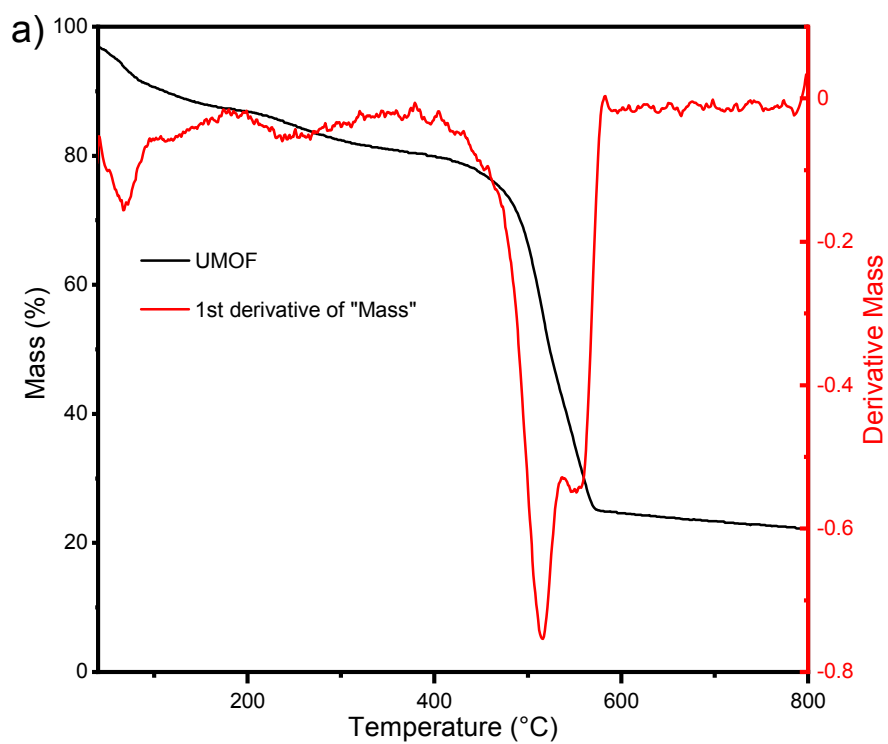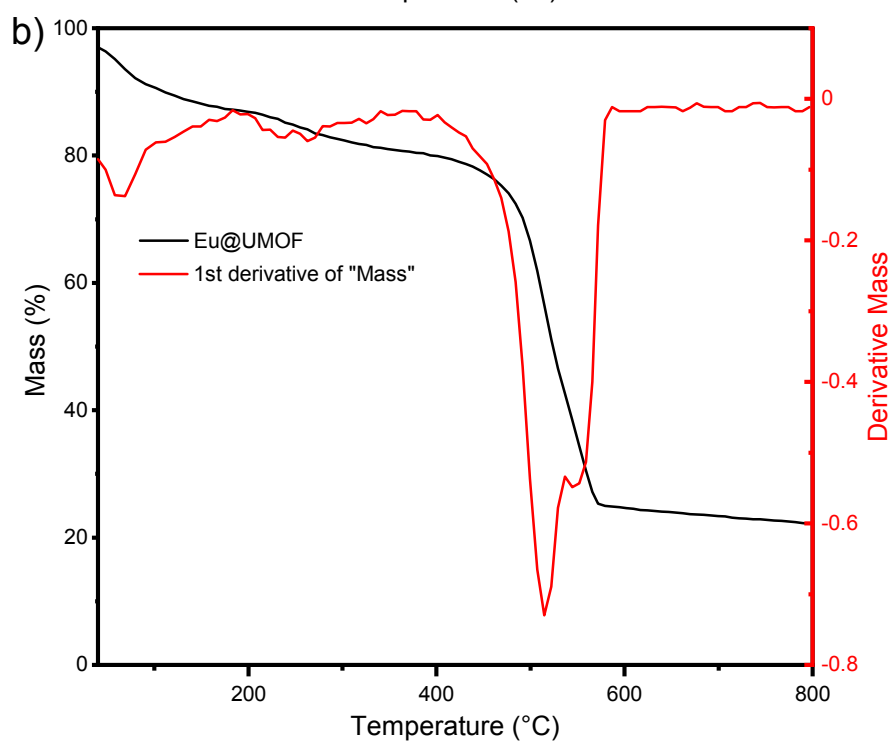

**Fig. S8.** The TG and DTG curve of **UMOF** (a) and **Eu@UMOF** (b) at temperature range of 40-800 °C

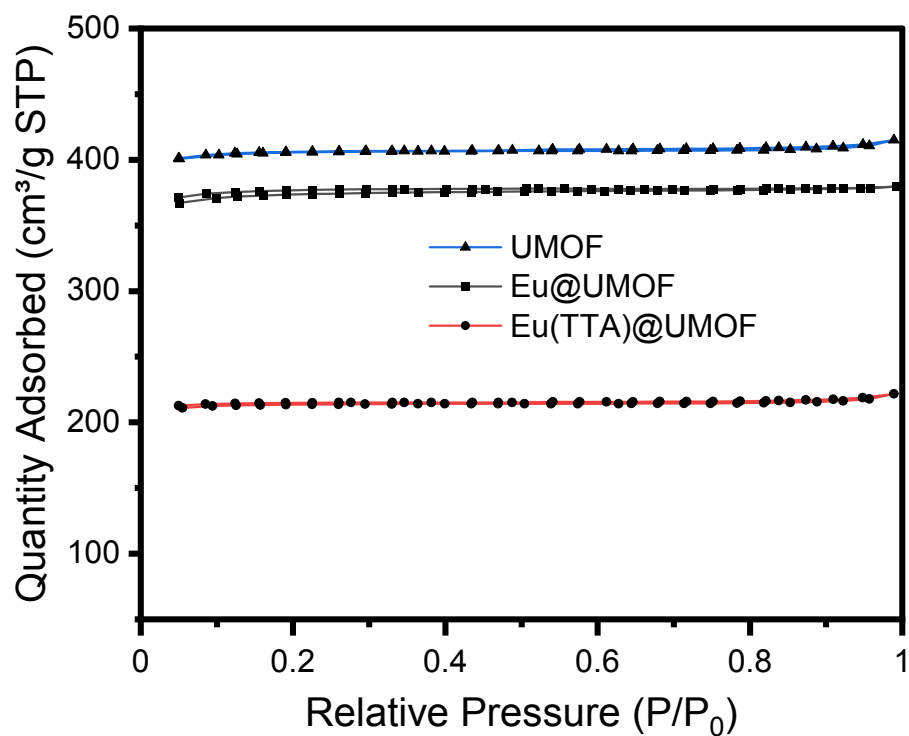

Fig. S9.  $N_2$  adsorption-desorption isotherms of **UMOF**, **Eu@UMOF** and **Eu(TTA)@UMOF**.

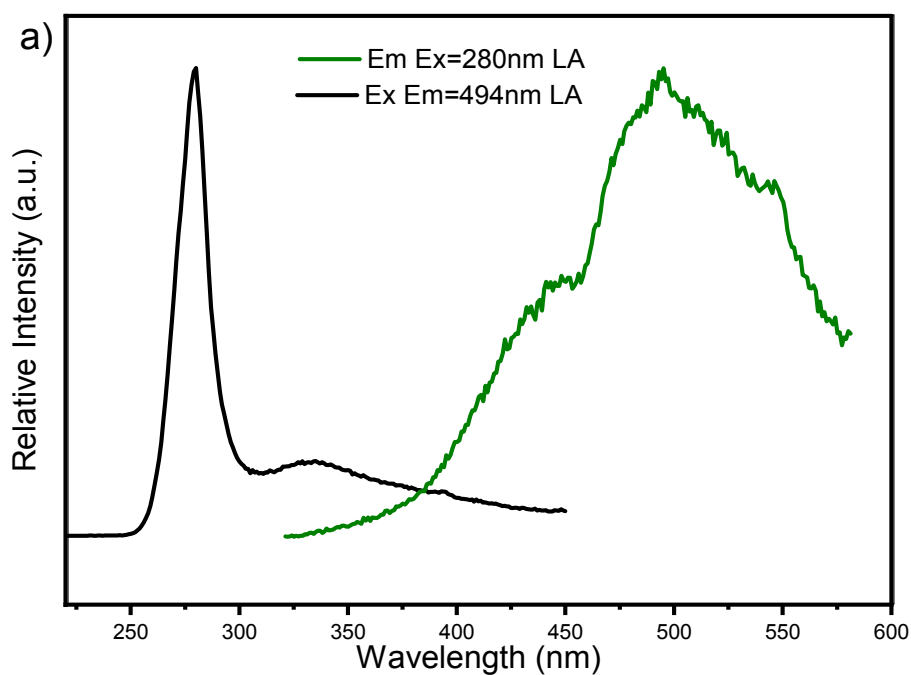

Fig. S10. The emission spectra of **LA** under the excitation of 280 nm

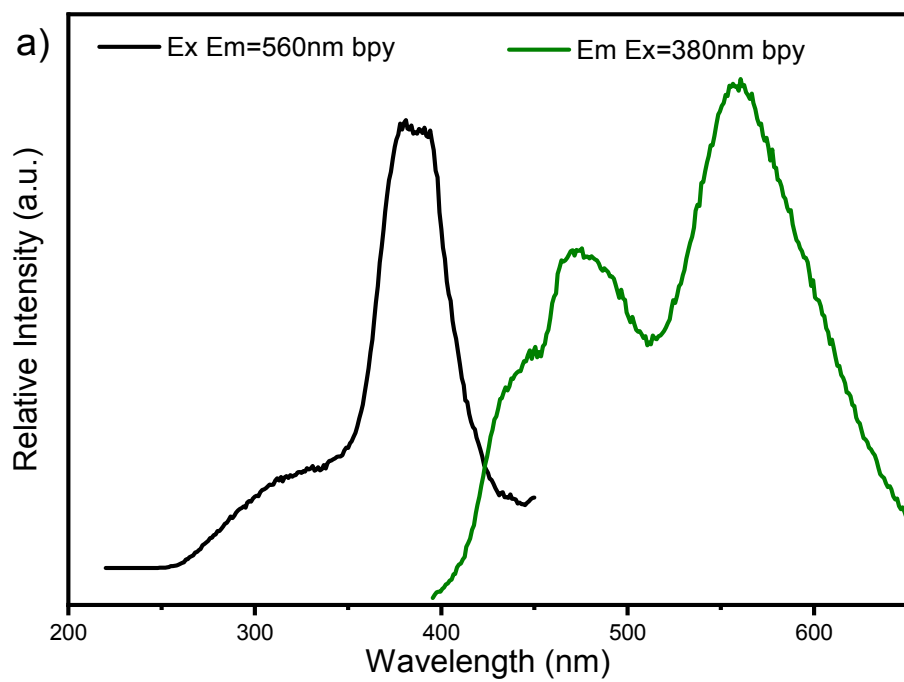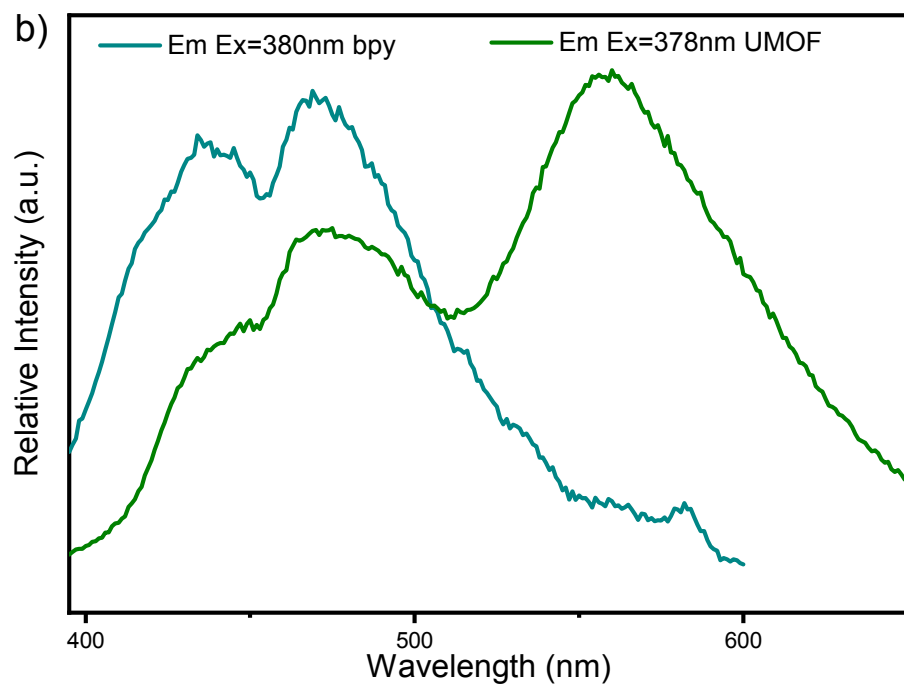

**Fig. S11.** The emission spectra of bpy (2,2-bipyridine-5,5-dicarboxylic acid) (a), **UMOF** and bpy (b)



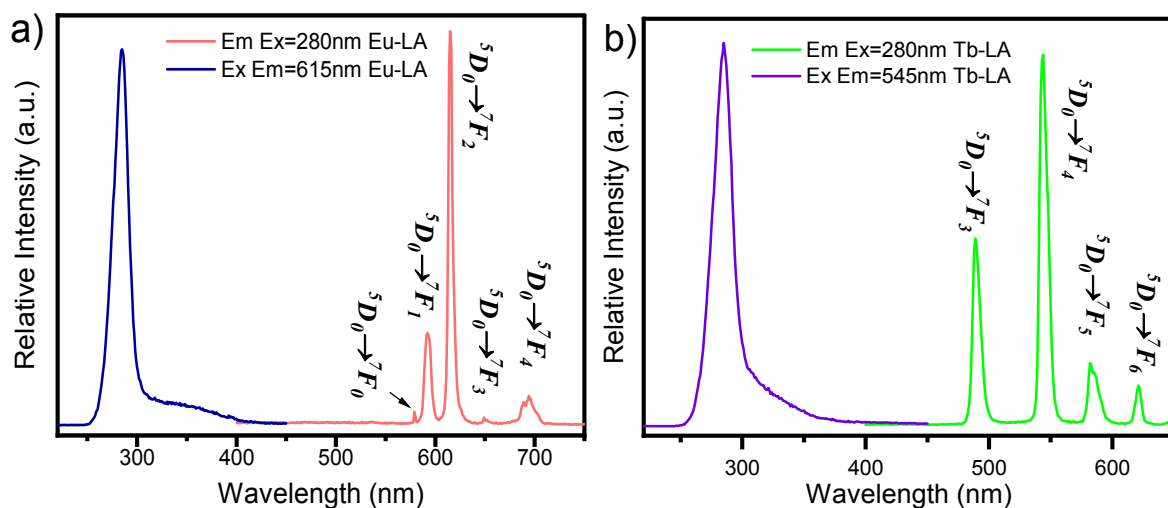

Fig. S12. The emission spectra of **Eu-LA** (a) and **Tb-LA** (b), under the excitation of 280nm

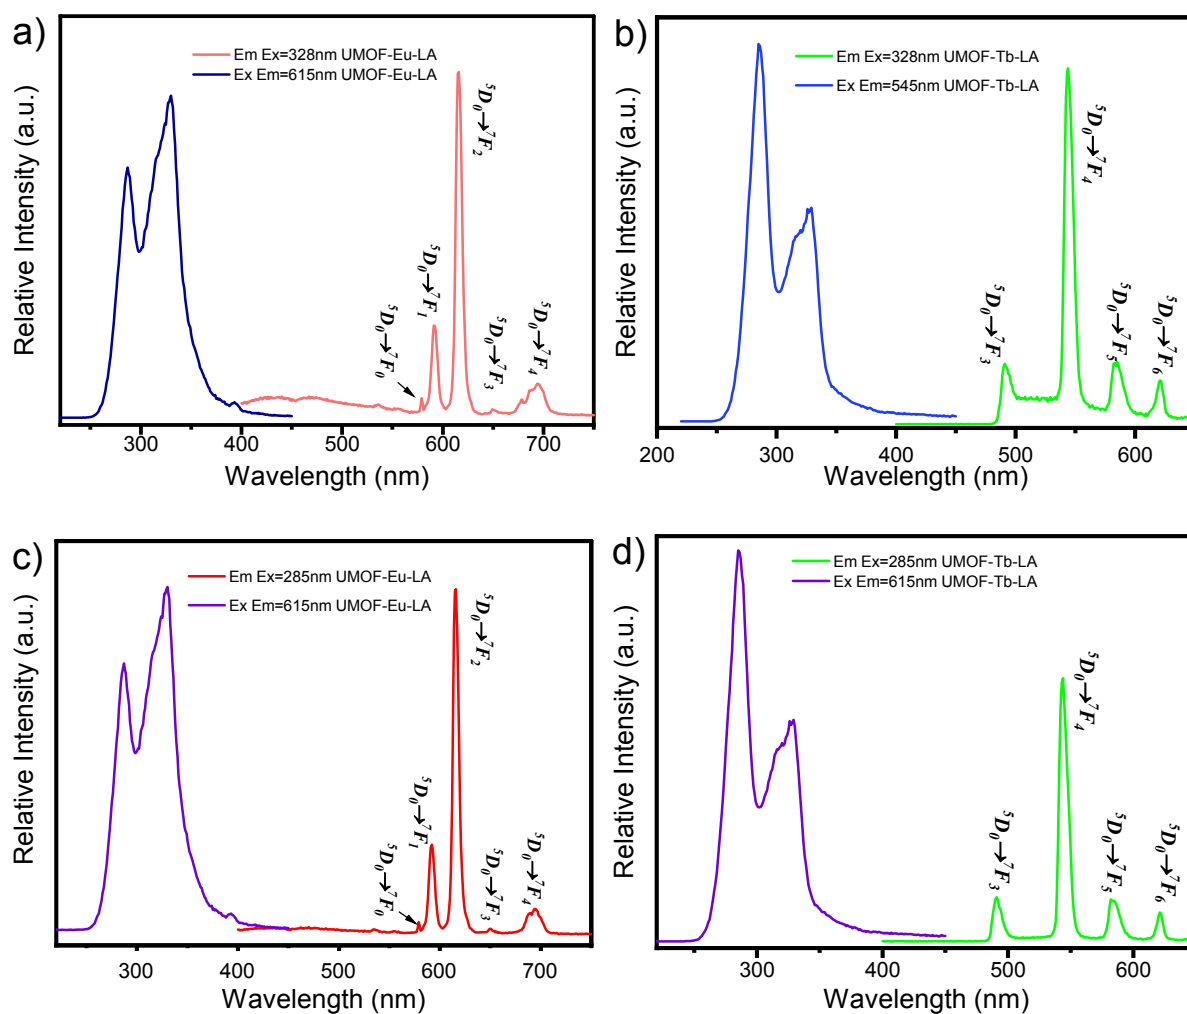

Fig. S13. The emission spectra of **UMOF-Eu-LA**, **UMOF-Tb-LA** under 328 nm (a,b), under 285 nm (c,d)

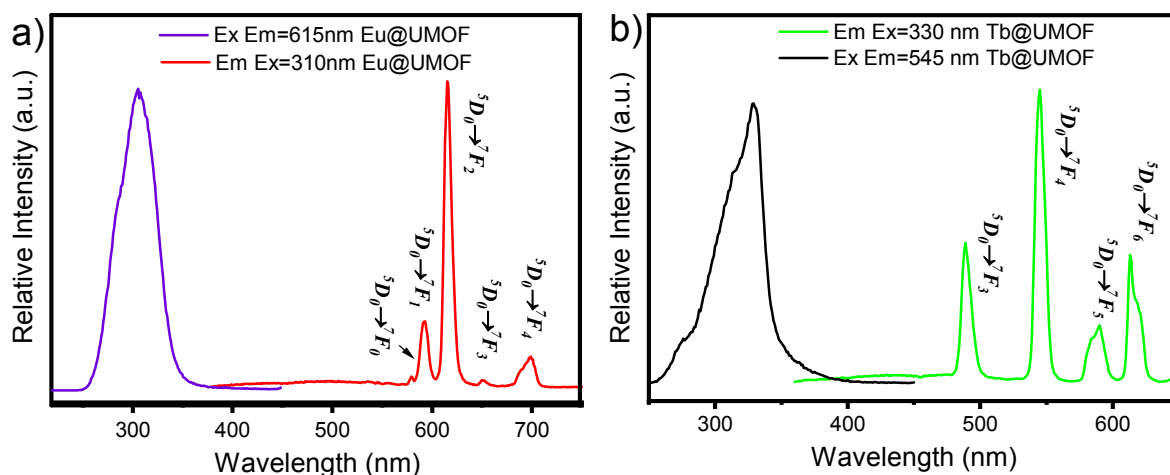

**Fig. S14.** The emission spectra of **Eu@UMOF** (a) and **Tb@UMOF** under the excitation of 310 nm and 330 nm, respectively.

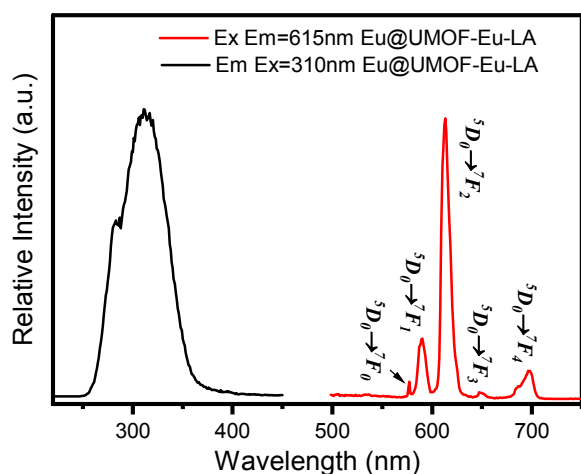

**Fig. S15.** The emission spectra of **Eu@UMOF-Eu-LA** film under the excitation of 310 nm

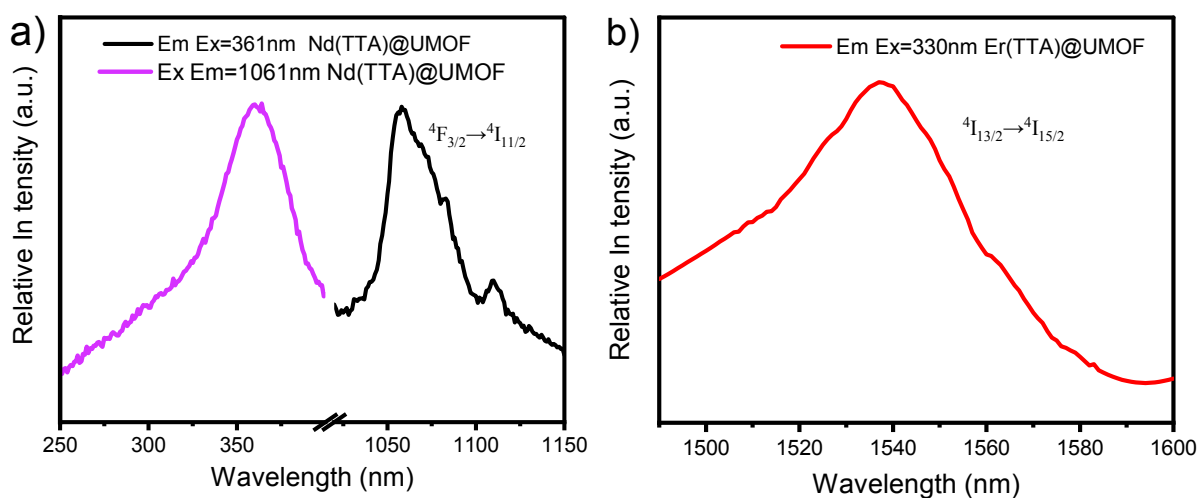

**Fig. S16.** The emission spectra of **Nd(TTA)@UMOF** under the excitation of 361 nm(a). the emission spectra of **Er(TTA)@UMOF** under the excitation of 330nm

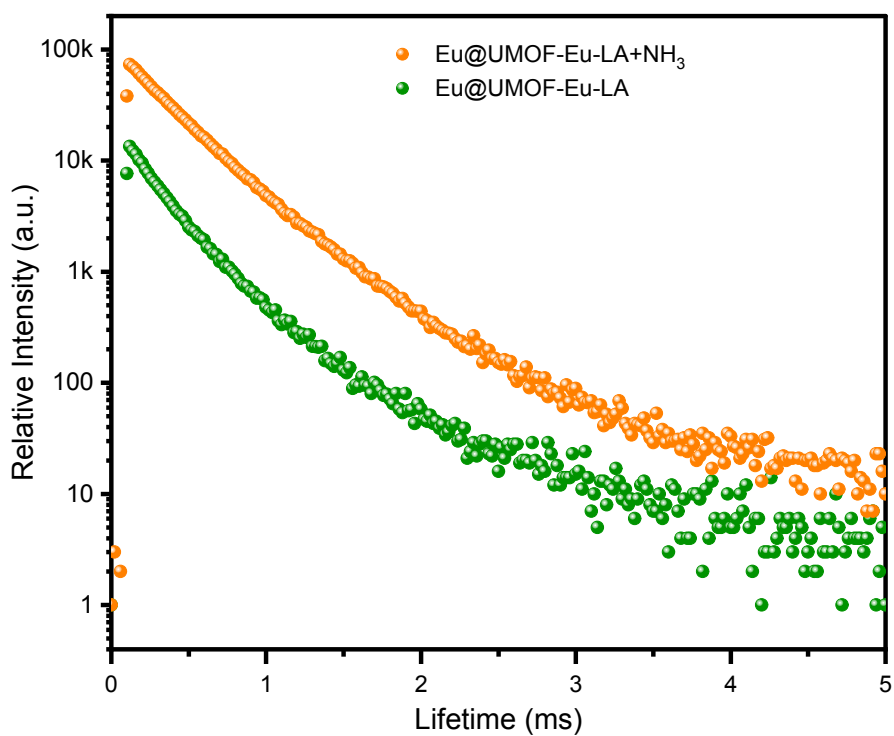

**Fig. S17.** The decay curve of **Eu@UMOF-Eu-LA** before and after exposed to  $\text{NH}_3$

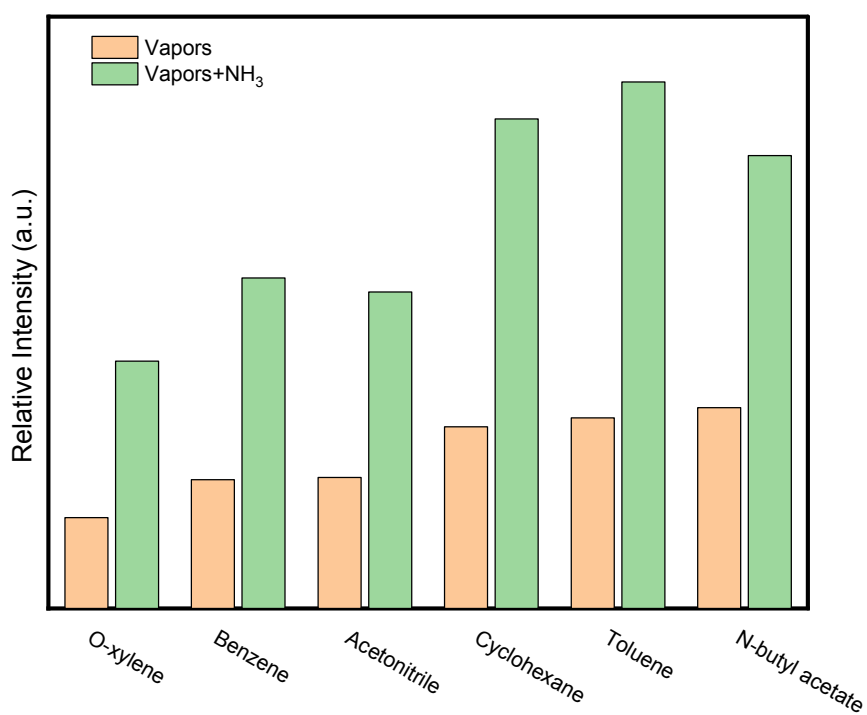

**Fig. S18.** The emission intensity of **Eu@UMOF-Eu-LA** at 615 nm after exposing to the pure vapors and mixed vapors with  $\text{NH}_3$

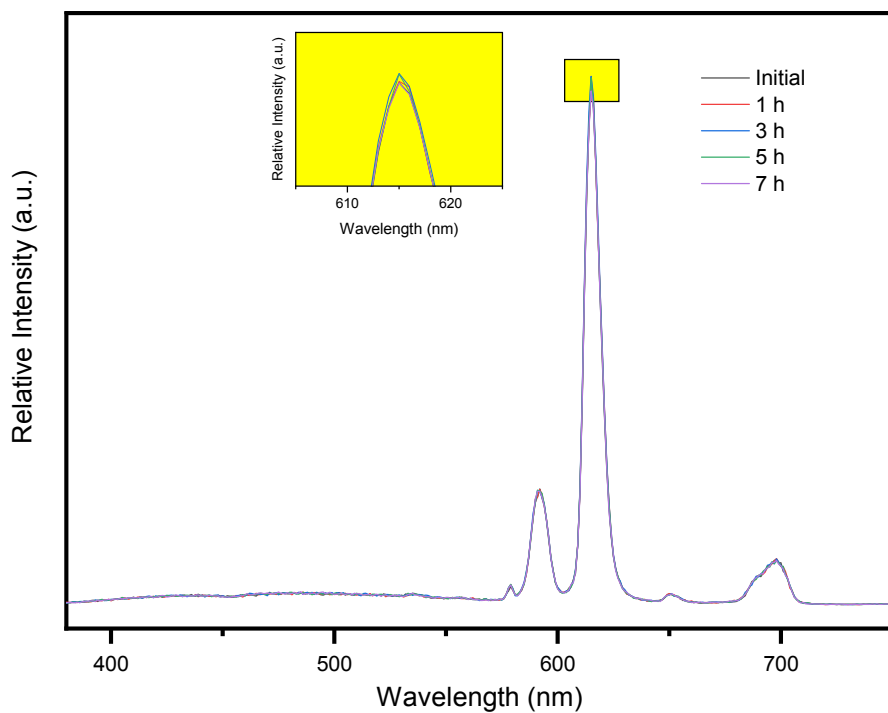

**Fig. S19.** The luminescent stability of **Eu@UMOF-Eu-LA** after 1 h, 3 h, 5 h, 7 h, under the excitation of 310 nm.

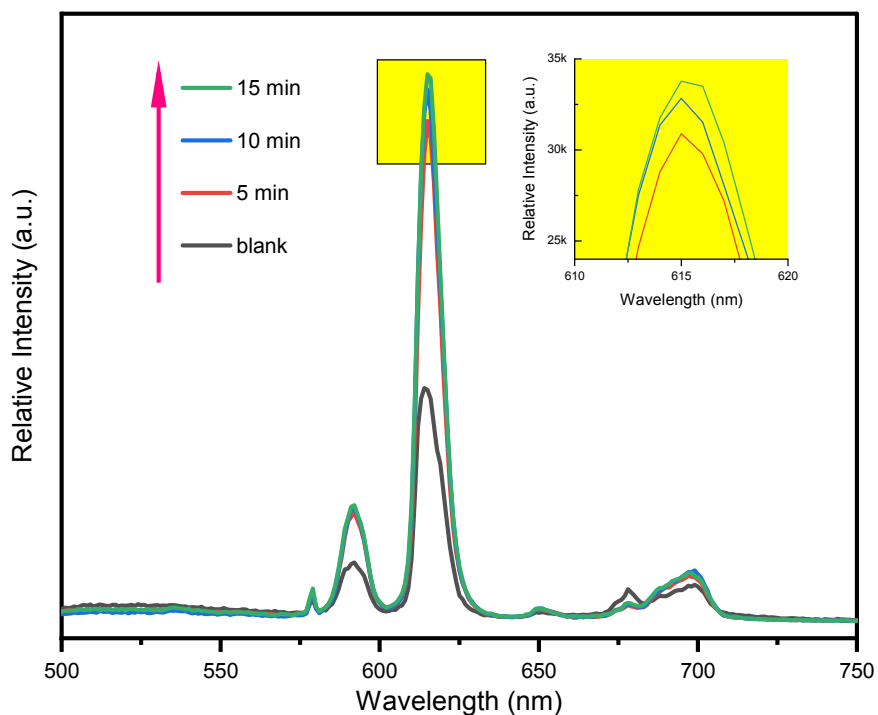

**Fig. S20.** The time response diagram of **Eu@UMOF-Eu-LA** film in the presences of **NH<sub>3</sub>**

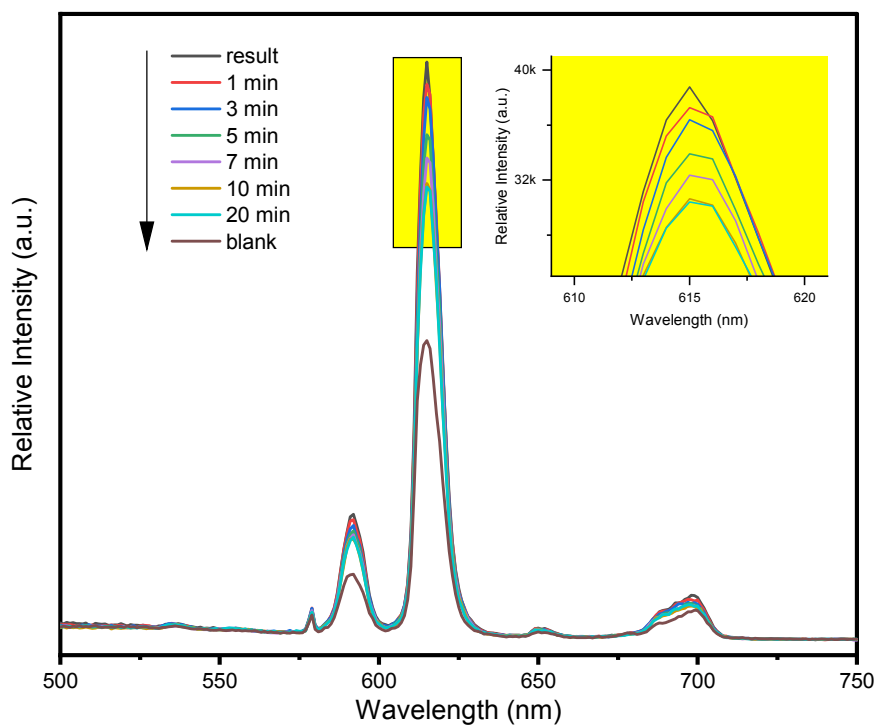

**Fig. S21.** The recover curve of **Eu@UMOF-Eu-LA** in the 40 °C oven

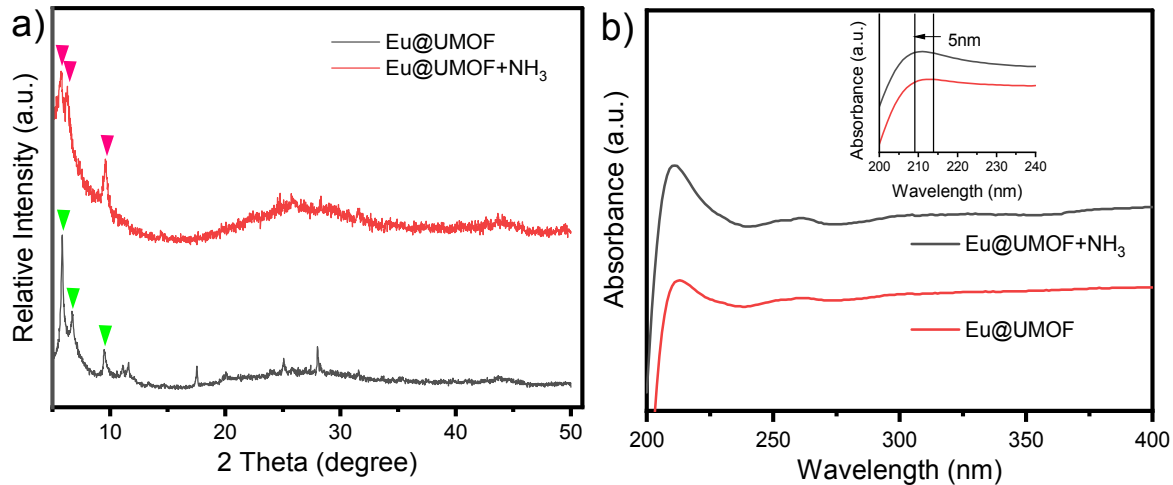

**Fig. S22.** The PXRD pattern (a) and the UV-Vis absorption spectra (b) of **Eu@UMOF** before and after exposed to  $\text{NH}_3$

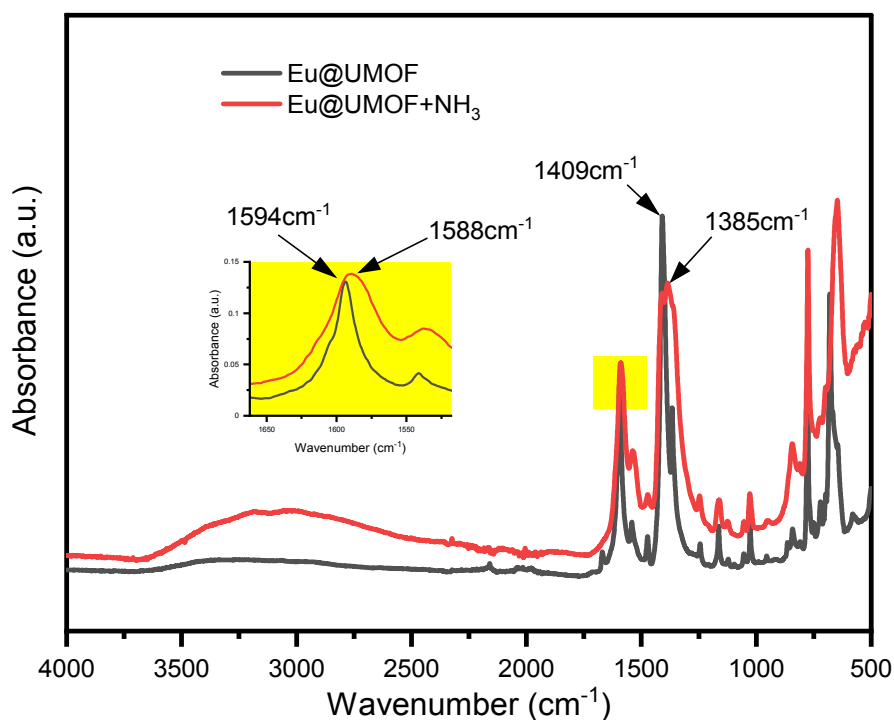

**Fig. S23.** The FTIR spectra of **Eu@UMOF** before and after exposed to  $\text{NH}_3$

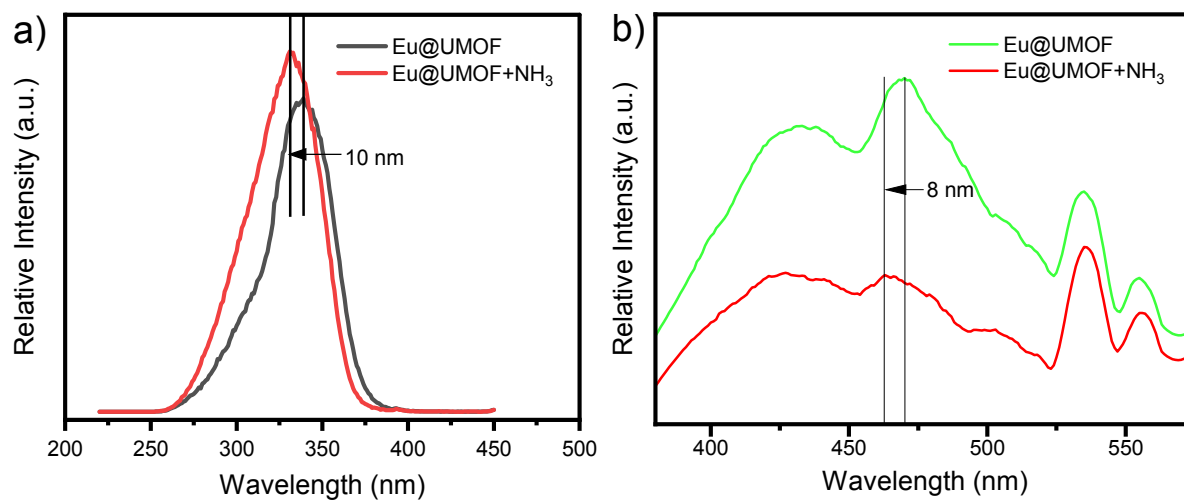

**Fig. S24.** The excitation spectra of **Eu@UMOF** and the emission spectra of ligand in **Eu@UMOF** before and after exposed to  $\text{NH}_3$

**Table. S1.** The element weight percentages of **UMOF**, **Eu@UMOF**, **Eu(TTA)@UMOF**

| Element | Atomic percentages |         |              |
|---------|--------------------|---------|--------------|
|         | UMOF               | Eu@UMOF | Eu(TTA)@UMOF |
| C       | 69.30              | 67.87   | 66.22        |
| N       | 8.79               | 8.08    | 8.10         |
| O       | 18.24              | 18.63   | 19.75        |
| F       | 0                  | 0       | 1.35         |
| S       | 0                  | 0       | 0.32         |
| Zr      | 3.67               | 5.09    | 4.06         |
| Eu      | 0                  | 0.32    | 0.20         |

**Table. S2.** The FTIR absorption peak and the related vibration of Linker

| Vibration                             | Absorption peak (cm <sup>-1</sup> ) |
|---------------------------------------|-------------------------------------|
| V(NH)                                 | 3415                                |
| aromatic                              | 3070                                |
| Vas(CH <sub>3</sub> )                 | 2974                                |
| Vas(CH <sub>2</sub> )                 | 2927                                |
| Vs(CH <sub>3</sub> -CH <sub>2</sub> ) | 2885                                |
| V(C=O)                                | 1675-1771                           |
| aromatic                              | 1608                                |
| δ(NH)-V(CN)                           | 1587                                |
| V(Si-OEt)                             | 1164-1103                           |

**Table. S3.** The triplet energy level of **L** and **UMOF**, and the difference with <sup>5</sup>D<sub>0</sub> of Eu<sup>3+</sup> ions

|             | T <sub>1</sub> -S <sub>0</sub> (cm <sup>-1</sup> ) | <sup>5</sup> D <sub>0</sub> of Eu <sup>3+</sup> (cm <sup>-1</sup> ) | Difference |
|-------------|----------------------------------------------------|---------------------------------------------------------------------|------------|
| <b>L</b>    | 19763                                              | 17500                                                               | 2263       |
| <b>UMOF</b> | 19646                                              | 17500                                                               | 2146       |
